# Supplementary material
Source: publisher figshare collection journal article supplement (https://tandf.figshare.com/ndownloader/files/17435939)
Supplement: Supplementary file 1 [file 17435939]

**Table A1.** Results of multiple regressions for plant life-forms distribution considering two variables (altitude and slope aspect). The employed models were: Gau+Gau (Gaussian for both variables), Sig+Sig (Sigmoidal for both variables) and Sig+Gau (Sigmoidal for altitude and Gaussian for slope aspect).

| **Plant life-form** | **Acronym** | **Model R2** | **Predictor model** |
| --- | --- | --- | --- |
| Trees | T | **0.767** | Sig+Sig |
| Nanophyllous sclerophyllous shrubs | SS | **0.548** | Sig+Sig |
| Caulescent non-pubescent rosettes | CNR | *0.279* | Sig+Sig |
| Tussock grasses | TG | **0.539** | Sig+Gau |
| Non-grass herbs | NGH | **0.488** | Sig+Sig |
| Mycrophyllous sclerophyllous shrubs | MSS | **0.379** | Sig+Gau |
| Leptophylous sclerophyllous shrubs | LSS | **0.627** | Sig+Sig |
| Caulescent pubescent rosettes | CPR | **0.525** | Sig+Sig |
| Acaulescent rosettes | AC | **0.743** | Gau+Gau |

All models are significant at *P* < 0.01. Coefficients in bold are significant at *P* < 0.001 and in italic at *P* < 0.01.
